# Supplementary material
Source: Springer Nature journal article supplement (https://www.springermedizin.de/resource/supplementary/12937_2012_602_MOESM4_ESM.pdf/25653756)

■ % of up-regulated genes  
■ % of down-regulated genes

A

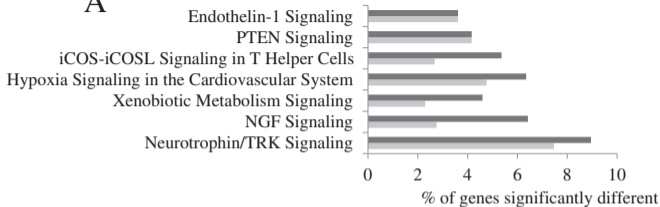

■ % of up-regulated genes  
■ % of down-regulated genes

B

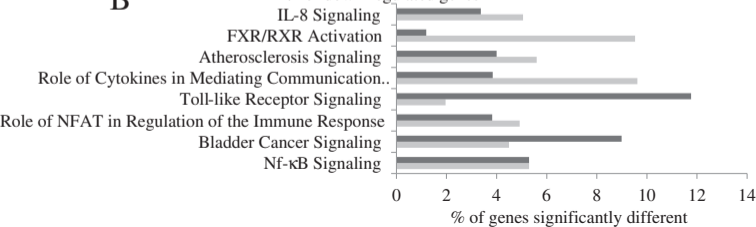

Supplement: MOESM4 [file 25653756]
